# Supplementary material for: The Interaction of SWI/SNF with the Ribosome Regulates Translation and Confers Sensitivity to Translation Pathway Inhibitors in Cancers with Complex Perturbations
Source: Oxford University Press journal article supplement (doi:10.1158/0008-5472.can-21-1360), 2022-06-24
Supplement: can-21-1360_table_s1_suppst1.docx [file can-21-1360_table_s1_suppst1.docx]

Table S1
